# Supplementary material for: Exploration of the interesting photovoltaic behavior of the fused benzothiophene dioxide moiety as a core donor with modification in acceptors for high-efficacy organic solar cells
Source: Royal Society of Chemistry journal article supplement (doi:10.1039/d2ra04473k), 2022-01-01
Supplement: d2ra04473k1.pdf [file d2ra04473k1.pdf]

### Supplementary Information

#### Exploration of Interesting Photovoltaic Behavior for Fused Benzothiophene dioxide Moiety as Core Donor with Modification in Acceptors for High Efficacy Organic Solar Cells

Muhammad Khalid,<sup>\*1,2</sup> Wajeeha Anwer<sup>1,2</sup> Muhammad Adeel,<sup>3</sup> Zahid Shafiq,<sup>4</sup> Ataulpa A. C. Braga,<sup>5</sup> Mohammed A. Assiri,<sup>6,7</sup> Muhammad Imran,<sup>6,7</sup> Aman Ullah<sup>\*8</sup>

<sup>1</sup>Institute of Chemistry, Khwaja Fareed University of Engineering & Information Technology, Rahim Yar Khan, 64200, Pakistan

<sup>2</sup>Centre for Theoretical and Computational Research, Khwaja Fareed University of Engineering & Information Technology, Rahim Yar Khan, 64200, Pakistan

<sup>3</sup>Institute of Chemical Sciences, Gomal University, Dera Ismail Khan, Khyber Pukhtoon Khwa, Pakistan

<sup>4</sup>Institute of Chemical Sciences Bahauddin Zakariya University, Multan 60800, Pakistan

<sup>5</sup>Departamento de Química Fundamental, Instituto de Química, Universidade de São Paulo, Av. Prof. Lineu Prestes, 748, São Paulo, 05508-000, Brazil

<sup>6</sup>Department of Chemistry, Faculty of Science, King Khalid University, P.O. Box 9004, Abha 61413, Saudi Arabia.

<sup>7</sup>Research center for Advanced Materials Science (RCAMS), King Khalid University, Abha 61514, P. O. Box 9004, Saudi Arabia.

<sup>8</sup>Department of Agricultural, Food and Nutritional Science, Faculty of Agricultural, Life and Environmental Sciences, University of Alberta, Edmonton, AB, Canada.

\*Corresponding authors E-mail addresses:

Dr. Muhammad Khalid ([muhammad.khalid@kfueit.edu.pk](mailto:muhammad.khalid@kfueit.edu.pk); [Khalid@iq.usp.br](mailto:Khalid@iq.usp.br))

**Table S1:** Cartesian coordinates of **R1** compound.

| Atom | X-axis   | Y-axis   | Z-axis   |
|------|----------|----------|----------|
| C    | -0.00896 | 1.429041 | 0.114513 |
| C    | -1.19959 | 0.720531 | 0.115042 |
| C    | -1.18877 | -0.69926 | 0.078634 |
| C    | 0.008345 | -1.4296  | 0.049893 |
| C    | 1.198957 | -0.72105 | 0.049135 |
| C    | 1.188161 | 0.69871  | 0.086499 |
| H    | -0.00012 | 2.514109 | 0.132387 |
| H    | -0.00034 | -2.51468 | 0.031643 |
| C    | 2.567377 | 1.126216 | 0.097887 |

|   |          |          |          |
|---|----------|----------|----------|
| C | 3.426332 | 0.04077  | 0.091556 |
| C | 6.24527  | 2.286751 | 0.124138 |
| C | 4.918941 | 1.856524 | 0.10461  |
| C | 4.775912 | 0.452481 | 0.084849 |
| H | 6.57091  | 3.320611 | 0.121644 |
| S | 3.363082 | 2.679248 | 0.10593  |
| S | 6.316186 | -0.34413 | 0.108812 |
| C | 7.156614 | 1.220743 | 0.11542  |
| C | 2.643394 | -1.27214 | 0.037783 |
| C | -3.42704 | -0.04144 | 0.078546 |
| C | -4.77667 | -0.45311 | 0.075985 |
| C | -4.9195  | -1.85726 | 0.067186 |
| C | -7.15723 | -1.22182 | 0.060547 |
| C | -6.24592 | -2.28777 | 0.06339  |
| H | -6.57131 | -3.32149 | 0.042345 |
| S | -3.36364 | -2.67984 | 0.064339 |
| S | -6.31737 | 0.34306  | 0.097172 |
| C | -2.56801 | -1.12681 | 0.07177  |
| C | -2.64415 | 1.271612 | 0.126098 |
| C | 3.013877 | -1.99898 | -1.27556 |
| C | 2.278761 | -1.81481 | -2.45344 |
| C | 4.172237 | -2.78971 | -1.32861 |
| C | 2.685418 | -2.41097 | -3.6484  |
| H | 1.383463 | -1.20312 | -2.44431 |
| C | 4.581143 | -3.38057 | -2.52354 |
| H | 4.75467  | -2.95788 | -0.42853 |
| C | 3.837447 | -3.19523 | -3.68936 |
| H | 2.097208 | -2.25765 | -4.5485  |
| H | 5.484152 | -3.9831  | -2.53946 |
| H | 4.153859 | -3.65666 | -4.61991 |
| C | 2.838443 | -2.15663 | 1.287629 |
| C | 2.479896 | -3.51282 | 1.256694 |
| C | 3.290872 | -1.61499 | 2.497062 |
| C | 2.574607 | -4.30281 | 2.401665 |
| H | 2.142982 | -3.95965 | 0.326886 |
| C | 3.390192 | -2.40679 | 3.642227 |
| H | 3.570098 | -0.56796 | 2.549243 |
| C | 3.031968 | -3.75333 | 3.600241 |
| H | 2.296002 | -5.35147 | 2.353182 |
| H | 3.752716 | -1.96681 | 4.566547 |
| H | 3.112817 | -4.37026 | 4.490075 |
| C | -3.01205 | 2.004026 | 1.437169 |
| C | -2.27987 | 1.816872 | 2.616535 |
| C | -4.16394 | 2.804269 | 1.486981 |

|   |          |          |          |
|---|----------|----------|----------|
| C | -2.68227 | 2.420075 | 3.809337 |
| H | -1.38961 | 1.197817 | 2.609661 |
| C | -4.56837 | 3.4027   | 2.679782 |
| H | -4.7442  | 2.974482 | 0.585959 |
| C | -3.8272  | 3.214964 | 3.846771 |
| H | -2.09599 | 2.264646 | 4.710374 |
| H | -5.46549 | 4.014094 | 2.692432 |
| H | -4.13954 | 3.68309  | 4.775401 |
| C | -2.8411  | 2.151585 | -1.1268  |
| C | -3.30455 | 1.608391 | -2.33124 |
| C | -2.47378 | 3.505685 | -1.10318 |
| C | -3.4063  | 2.396751 | -3.47864 |
| H | -3.59109 | 0.563186 | -2.37843 |
| C | -2.57069 | 4.292041 | -2.25036 |
| H | -2.12829 | 3.95406  | -0.17723 |
| C | -3.03923 | 3.741027 | -3.44395 |
| H | -3.77817 | 1.955784 | -4.39868 |
| H | -2.28509 | 5.339064 | -2.20759 |
| H | -3.12208 | 4.355159 | -4.33549 |
| C | 8.554486 | 1.478912 | 0.067559 |
| C | 9.677485 | 0.699686 | -0.04926 |
| H | 8.744483 | 2.54381  | 0.139377 |
| C | -8.55468 | -1.47974 | -0.00106 |
| C | -9.67704 | -0.6999  | -0.11837 |
| H | -8.74492 | -2.54545 | 0.057354 |
| C | 11.99889 | -0.00187 | 0.116497 |
| C | 11.36511 | -1.25346 | 0.103067 |
| C | 12.02942 | -2.4595  | 0.263869 |
| C | 13.40963 | -2.42073 | 0.462685 |
| C | 14.07299 | -1.19082 | 0.498661 |
| C | 13.38779 | 0.012196 | 0.329573 |
| H | 11.48501 | -3.3976  | 0.243688 |
| H | 13.96455 | -3.34378 | 0.595997 |
| H | 15.14502 | -1.16318 | 0.66543  |
| H | 13.94072 | 0.938577 | 0.376188 |
| C | -13.4136 | 2.411646 | 0.408773 |
| C | -14.0752 | 1.180555 | 0.43526  |
| C | -13.3883 | -0.0201  | 0.256514 |
| C | -11.9995 | -0.0021  | 0.043316 |
| C | -11.3672 | 1.250321 | 0.040357 |
| C | -12.0333 | 2.454056 | 0.210538 |
| H | -13.9698 | 3.332808 | 0.549419 |
| H | -15.1471 | 1.150103 | 0.602273 |
| H | -13.9395 | -0.94785 | 0.296324 |

|   |          |          |          |
|---|----------|----------|----------|
| H | -11.4903 | 3.393078 | 0.198171 |
| S | 9.613664 | -1.10022 | -0.14772 |
| S | -9.61494 | 1.100535 | -0.20811 |
| C | -11.0638 | -1.14171 | -0.16616 |
| C | 11.06475 | 1.140844 | -0.08399 |
| C | 11.4847  | 2.445649 | -0.31552 |
| C | -11.4815 | -2.44339 | -0.41766 |
| C | 10.59912 | 3.529819 | -0.60042 |
| N | 9.912916 | 4.442791 | -0.83398 |
| C | 12.84972 | 2.864764 | -0.33649 |
| N | 13.94185 | 3.270473 | -0.36539 |
| C | -10.5932 | -3.52207 | -0.71483 |
| N | -9.9042  | -4.42988 | -0.95984 |
| C | -12.8463 | -2.86257 | -0.45158 |
| N | -13.9383 | -3.26752 | -0.49173 |
| O | 8.883102 | -1.6604  | 1.00181  |
| O | 9.241824 | -1.54175 | -1.50099 |
| O | -9.24003 | 1.545547 | -1.55927 |
| O | -8.8886  | 1.658877 | 0.945089 |

**Table S2:** Cartesian coordinates of **D2** compound.

| Atom | X-axis    | Y-axis    | Z-axis    |
|------|-----------|-----------|-----------|
| C    | 0.216561  | -1.412763 | 0.027499  |
| C    | 1.291018  | -0.537958 | 0.038603  |
| C    | 1.074207  | 0.865163  | 0.007166  |
| C    | -0.216609 | 1.41267   | -0.027336 |
| C    | -1.291068 | 0.537865  | -0.038434 |
| C    | -1.074256 | -0.865256 | -0.007006 |
| H    | 0.366283  | -2.48752  | 0.041787  |
| H    | -0.36633  | 2.487427  | -0.041621 |
| C    | -2.377044 | -1.489035 | -0.008738 |
| C    | -3.385008 | -0.54117  | -0.017743 |
| C    | -5.84813  | -3.170326 | -0.000889 |
| C    | -4.59793  | -2.551774 | -0.012518 |
| C    | -4.662701 | -1.143161 | -0.025188 |
| H    | -6.017921 | -4.240865 | 0.009142  |
| S    | -2.939071 | -3.141283 | -0.006288 |
| S    | -6.305465 | -0.575991 | -0.024147 |
| C    | -6.907409 | -2.251062 | -0.002483 |
| C    | -2.801009 | 0.871891  | -0.059359 |
| C    | 3.384958  | 0.541074  | 0.01792   |
| C    | 4.662653  | 1.14306   | 0.025326  |

|   |           |           |           |
|---|-----------|-----------|-----------|
| C | 4.597886  | 2.551673  | 0.01263   |
| C | 6.907366  | 2.250955  | 0.002661  |
| C | 5.848088  | 3.17022   | 0.001028  |
| H | 6.017881  | 4.240759  | -0.008996 |
| S | 2.939028  | 3.141187  | 0.006419  |
| S | 6.305415  | 0.575883  | 0.024262  |
| C | 2.376996  | 1.488941  | 0.008903  |
| C | 2.800959  | -0.871985 | 0.059532  |
| C | -3.260238 | 1.54322   | -1.374538 |
| C | -2.503539 | 1.451884  | -2.549833 |
| C | -4.508461 | 2.181869  | -1.433706 |
| C | -2.976326 | 1.990933  | -3.747359 |
| H | -1.538122 | 0.958348  | -2.535986 |
| C | -4.981546 | 2.718431  | -2.630845 |
| H | -5.111408 | 2.274687  | -0.536263 |
| C | -4.21624  | 2.627052  | -3.793764 |
| H | -2.369518 | 1.91176   | -4.644691 |
| H | -5.950503 | 3.20824   | -2.650364 |
| H | -4.582491 | 3.047645  | -4.725433 |
| C | -3.132984 | 1.713947  | 1.190548  |
| C | -2.955998 | 3.105933  | 1.171212  |
| C | -3.532111 | 1.110668  | 2.389536  |
| C | -3.1737   | 3.870152  | 2.3168    |
| H | -2.664219 | 3.598614  | 0.249305  |
| C | -3.75377  | 1.876003  | 3.535811  |
| H | -3.672514 | 0.035896  | 2.432595  |
| C | -3.574918 | 3.258137  | 3.505285  |
| H | -3.034556 | 4.946586  | 2.277118  |
| H | -4.069846 | 1.386643  | 4.45238   |
| H | -3.750456 | 3.853753  | 4.396015  |
| C | 3.260181  | -1.543316 | 1.374712  |
| C | 2.503379  | -1.452132 | 2.549953  |
| C | 4.5085    | -2.181774 | 1.43396   |
| C | 2.976149  | -1.991157 | 3.747497  |
| H | 1.537891  | -0.958736 | 2.536047  |
| C | 4.981569  | -2.718308 | 2.631118  |
| H | 5.11154   | -2.274457 | 0.536566  |
| C | 4.216154  | -2.627092 | 3.793978  |
| H | 2.369257  | -1.912106 | 4.644782  |
| H | 5.950601  | -3.207967 | 2.650699  |
| H | 4.582393  | -3.047665 | 4.72566   |
| C | 3.132926  | -1.714023 | -1.190393 |
| C | 3.532248  | -1.110725 | -2.389307 |

|   |            |           |           |
|---|------------|-----------|-----------|
| C | 2.955702   | -3.10598  | -1.171172 |
| C | 3.753883   | -1.876016 | -3.535616 |
| H | 3.672829   | -0.035973 | -2.432279 |
| C | 3.173377   | -3.870155 | -2.316795 |
| H | 2.663748   | -3.598676 | -0.249329 |
| C | 3.574802   | -3.258124 | -3.505202 |
| H | 4.070116   | -1.386644 | -4.452124 |
| H | 3.034047   | -4.946568 | -2.277201 |
| H | 3.750319   | -3.853705 | -4.395958 |
| C | -8.251191  | -2.717502 | 0.011185  |
| C | -9.478733  | -2.098857 | 0.016263  |
| H | -8.274833  | -3.80225  | 0.021538  |
| C | 8.251148   | 2.717406  | -0.010915 |
| C | 9.478719   | 2.0988    | -0.015957 |
| H | 8.274769   | 3.802156  | -0.021247 |
| C | -11.790754 | -1.714209 | 0.03623   |
| C | -11.202367 | -0.472163 | 0.018458  |
| C | 11.790757  | 1.714279  | -0.03614  |
| C | 11.202442  | 0.4722    | -0.018507 |
| C | 10.785118  | 2.777983  | -0.035834 |
| C | -10.785166 | -2.777966 | 0.036256  |
| C | -11.090369 | -4.126475 | 0.05351   |
| C | 11.090239  | 4.12652   | -0.05283  |
| C | -10.117333 | -5.170415 | 0.055467  |
| N | -9.340541  | -6.039064 | 0.057982  |
| C | -12.445415 | -4.576962 | 0.07204   |
| N | -13.549468 | -4.949331 | 0.087347  |
| C | 10.117135  | 5.170394  | -0.054483 |
| N | 9.340147   | 6.038868  | -0.056738 |
| C | 12.445256  | 4.577084  | -0.071427 |
| N | 13.549307  | 4.949457  | -0.0868   |
| C | 9.736641   | 0.63028   | -0.004163 |
| C | -9.736572  | -0.630323 | 0.004419  |
| O | 8.912203   | -0.276171 | 0.01384   |
| O | -8.912073  | 0.276081  | -0.013361 |
| C | 14.543966  | -0.998992 | -0.042865 |
| C | 13.457272  | -0.126158 | -0.038277 |
| C | 12.124737  | -0.614172 | -0.019201 |
| C | 11.890222  | -1.998109 | -0.004941 |
| C | 12.970209  | -2.867558 | -0.009403 |
| C | 14.296125  | -2.369032 | -0.028344 |
| H | 15.566424  | -0.639937 | -0.057365 |
| H | 10.875143  | -2.376226 | 0.008938  |

|    |            |           |           |
|----|------------|-----------|-----------|
| C  | -11.890027 | 1.998182  | 0.004404  |
| C  | -12.969974 | 2.867682  | 0.008599  |
| C  | -14.295917 | 2.369221  | 0.027448  |
| C  | -14.543825 | 0.999195  | 0.042144  |
| C  | -13.457171 | 0.126312  | 0.037834  |
| C  | -12.124609 | 0.614257  | 0.01885   |
| H  | -10.87493  | 2.376251  | -0.009409 |
| H  | -15.566301 | 0.64019   | 0.056565  |
| S  | 13.533231  | 1.641786  | -0.054789 |
| S  | -13.533205 | -1.641628 | 0.054625  |
| Cl | 15.661322  | -3.453472 | -0.034276 |
| Cl | 12.661297  | -4.585487 | 0.00867   |
| Cl | -15.661062 | 3.453727  | 0.033044  |
| Cl | -12.66098  | 4.585594  | -0.009686 |

**Table S3:** Cartesian coordinates of **D3** compound.

| Atom | X-axis    | Y-axis    | Z-axis    |
|------|-----------|-----------|-----------|
| C    | 0.253018  | -1.407275 | 0.023532  |
| C    | 1.304522  | -0.505456 | 0.035974  |
| C    | 1.051203  | 0.892072  | 0.008442  |
| C    | -0.253017 | 1.407286  | -0.023521 |
| C    | -1.304522 | 0.505468  | -0.035959 |
| C    | -1.051203 | -0.892061 | -0.008432 |
| H    | 0.430407  | -2.477797 | 0.034713  |
| H    | -0.430405 | 2.477808  | -0.034699 |
| C    | -2.337014 | -1.548951 | -0.011264 |
| C    | -3.369192 | -0.626111 | -0.017046 |
| C    | -5.760512 | -3.318129 | -0.009936 |
| C    | -4.528372 | -2.668801 | -0.019217 |
| C    | -4.629559 | -1.260459 | -0.027398 |
| H    | -5.903406 | -4.392639 | -0.002651 |
| S    | -2.85468  | -3.215261 | -0.01442  |
| S    | -6.284727 | -0.734037 | -0.026663 |
| C    | -6.844565 | -2.424544 | -0.009525 |
| C    | -2.822179 | 0.801435  | -0.054252 |
| C    | 3.369193  | 0.626122  | 0.017062  |
| C    | 4.62956   | 1.26047   | 0.027358  |
| C    | 4.528372  | 2.668812  | 0.019128  |
| C    | 6.844566  | 2.424559  | 0.009437  |
| C    | 5.760511  | 3.318143  | 0.009805  |
| H    | 5.903405  | 4.392652  | 0.002463  |
| S    | 2.85468   | 3.215271  | 0.014363  |

|   |           |           |           |
|---|-----------|-----------|-----------|
| S | 6.28473   | 0.734053  | 0.026628  |
| C | 2.337014  | 1.548962  | 0.011266  |
| C | 2.822179  | -0.801423 | 0.054279  |
| C | -3.299622 | 1.464395  | -1.367469 |
| C | -2.545765 | 1.385549  | -2.54555  |
| C | -4.559278 | 2.080534  | -1.42186  |
| C | -3.032257 | 1.915909  | -3.741383 |
| H | -1.571783 | 0.908919  | -2.535384 |
| C | -5.045695 | 2.608995  | -2.617393 |
| H | -5.16022  | 2.163889  | -0.522144 |
| C | -4.283085 | 2.53073   | -3.783001 |
| H | -2.427595 | 1.847261  | -4.640977 |
| H | -6.022391 | 3.08321   | -2.633221 |
| H | -4.65969  | 2.945508  | -4.713083 |
| C | -3.173889 | 1.630064  | 1.19945   |
| C | -3.033654 | 3.026253  | 1.184252  |
| C | -3.554606 | 1.012365  | 2.397078  |
| C | -3.270104 | 3.780686  | 2.332598  |
| H | -2.757267 | 3.529673  | 0.263456  |
| C | -3.794797 | 1.767881  | 3.546147  |
| H | -3.665748 | -0.065985 | 2.437724  |
| C | -3.653103 | 3.15437   | 3.519623  |
| H | -3.160749 | 4.860586  | 2.296013  |
| H | -4.096238 | 1.267499  | 4.461648  |
| H | -3.843819 | 3.742344  | 4.412219  |
| C | 3.299618  | -1.464378 | 1.367499  |
| C | 2.545765  | -1.385521 | 2.545582  |
| C | 4.559274  | -2.080517 | 1.42189   |
| C | 3.03226   | -1.915871 | 3.741417  |
| H | 1.571785  | -0.908885 | 2.535415  |
| C | 5.045693  | -2.60897  | 2.617426  |
| H | 5.160213  | -2.163879 | 0.522173  |
| C | 4.283086  | -2.530695 | 3.783036  |
| H | 2.427601  | -1.847216 | 4.641012  |
| H | 6.022389  | -3.083186 | 2.633254  |
| H | 4.659694  | -2.945467 | 4.713119  |
| C | 3.173894  | -1.630055 | -1.199418 |
| C | 3.554622  | -1.012356 | -2.397042 |
| C | 3.033642  | -3.026242 | -1.184225 |
| C | 3.794812  | -1.767872 | -3.546111 |
| H | 3.665775  | 0.065993  | -2.437685 |
| C | 3.27009   | -3.780675 | -2.332572 |
| H | 2.757239  | -3.529661 | -0.263433 |



|   |            |           |           |
|---|------------|-----------|-----------|
| C | 3.653105   | -3.15436  | -3.519592 |
| H | 4.096265   | -1.267491 | -4.461609 |
| H | 3.160722   | -4.860573 | -2.295989 |
| H | 3.84382    | -3.742333 | -4.412188 |
| C | -8.172556  | -2.92425  | 0.004435  |
| C | -9.418346  | -2.335618 | 0.011787  |
| H | -8.170159  | -4.009328 | 0.013592  |
| C | 8.172559   | 2.924263  | -0.004582 |
| C | 9.418347   | 2.335622  | -0.011989 |
| H | 8.170165   | 4.009341  | -0.013769 |
| C | -11.740105 | -2.008113 | 0.03704   |
| C | -11.182137 | -0.753613 | 0.01901   |
| C | 11.740102  | 2.008094  | -0.037195 |
| C | 11.182129  | 0.7536    | -0.019066 |
| C | 10.703643  | 3.047722  | -0.034405 |
| C | -10.703637 | -3.047735 | 0.034124  |
| C | -10.9805   | -4.401908 | 0.051338  |
| C | 10.980518  | 4.401888  | -0.051763 |
| C | -9.984099  | -5.42353  | 0.049904  |
| N | -9.185195  | -6.27164  | 0.04957   |
| C | -12.326434 | -4.878087 | 0.073657  |
| N | -13.425758 | -5.263992 | 0.092285  |
| C | 9.98412    | 5.423513  | -0.050486 |
| N | 9.185289   | 6.271691  | -0.050309 |
| C | 12.326459  | 4.878042  | -0.074169 |
| N | 13.425766  | 5.263994  | -0.09286  |
| C | 9.710219   | 0.875639  | -0.000121 |
| C | -9.710233  | -0.875639 | -0.000047 |
| O | 8.913262   | -0.053891 | 0.02299   |
| O | -8.913288  | 0.0539    | -0.023189 |
| C | 14.564623  | -0.627425 | -0.048666 |
| C | 13.452903  | 0.216739  | -0.036    |
| C | 12.132038  | -0.306586 | -0.020871 |
| C | 11.933298  | -1.697873 | 0.002866  |
| C | 13.03817   | -2.526753 | 0.004943  |
| C | 14.345682  | -1.996058 | -0.037031 |
| H | 15.582347  | -0.257436 | -0.083666 |
| H | 10.934783  | -2.11622  | 0.038866  |
| C | -11.933316 | 1.697857  | -0.002633 |
| C | -13.038193 | 2.526732  | -0.004593 |
| C | -14.345705 | 1.996025  | 0.037324  |
| C | -14.564634 | 0.627387  | 0.048823  |
| C | -13.452911 | -0.216768 | 0.036048  |

|   |            |           |           |
|---|------------|-----------|-----------|
| C | -12.132049 | 0.306566  | 0.02096   |
| H | -10.934799 | 2.116203  | -0.038616 |
| H | -15.582359 | 0.257397  | 0.083805  |
| S | 13.48317   | 1.980981  | -0.055588 |
| S | -13.483164 | -1.981015 | 0.055441  |
| N | 15.531049  | -2.855728 | -0.205928 |
| O | 16.568602  | -2.483613 | 0.335344  |
| O | 15.403429  | -3.842293 | -0.921986 |
| N | 12.789786  | -3.969254 | 0.190308  |
| O | 13.528302  | -4.561764 | 0.968775  |
| O | 11.825225  | -4.446334 | -0.399111 |
| N | -12.789782 | 3.969251  | -0.189833 |
| O | -13.528105 | 4.561773  | -0.96847  |
| O | -11.825432 | 4.446331  | 0.399921  |
| N | -15.531068 | 2.855668  | 0.206334  |
| O | -16.568677 | 2.483531  | -0.334818 |
| O | -15.403381 | 3.842306  | 0.922287  |

**Table S4:** Cartesian coordinates of **D4** compound.

| Atom | X-axis    | Y-axis    | Z-axis    |
|------|-----------|-----------|-----------|
| C    | 0.299377  | -1.39799  | 0.004511  |
| C    | 1.320437  | -0.461715 | 0.026791  |
| C    | 1.021337  | 0.926575  | 0.018105  |
| C    | -0.299496 | 1.397808  | -0.004421 |
| C    | -1.320556 | 0.461534  | -0.026696 |
| C    | -1.021455 | -0.926757 | -0.018022 |
| H    | 0.512312  | -2.462101 | 0.001247  |
| H    | -0.512426 | 2.46192   | -0.001163 |
| C    | -2.285135 | -1.62582  | -0.027192 |
| C    | -3.347363 | -0.738561 | -0.020098 |
| C    | -5.648794 | -3.509232 | -0.040543 |
| C    | -4.438412 | -2.817814 | -0.045399 |
| C    | -4.586808 | -1.414689 | -0.036838 |
| H    | -5.755081 | -4.587992 | -0.044033 |
| S    | -2.747673 | -3.308158 | -0.049728 |
| S    | -6.260188 | -0.945843 | -0.028465 |
| C    | -6.761287 | -2.653982 | -0.028156 |
| C    | -2.847502 | 0.706849  | -0.038091 |
| C    | 3.347247  | 0.738375  | 0.020126  |
| C    | 4.586695  | 1.414505  | 0.036705  |
| C    | 4.438295  | 2.817631  | 0.045207  |
| C    | 6.761178  | 2.653811  | 0.027962  |

|   |           |           |           |
|---|-----------|-----------|-----------|
| C | 5.648675  | 3.509052  | 0.04025   |
| H | 5.754957  | 4.587813  | 0.043716  |
| S | 2.747557  | 3.307974  | 0.049652  |
| S | 6.260078  | 0.945669  | 0.028136  |
| C | 2.285019  | 1.625635  | 0.027238  |
| C | 2.84738   | -0.707035 | 0.038169  |
| C | -3.349439 | 1.373982  | -1.339797 |
| C | -2.593769 | 1.34275   | -2.518883 |
| C | -4.630563 | 1.94497   | -1.383701 |
| C | -3.099489 | 1.875995  | -3.705425 |
| H | -1.603501 | 0.901012  | -2.516036 |
| C | -5.136323 | 2.476078  | -2.569949 |
| H | -5.233827 | 1.989429  | -0.482803 |
| C | -4.371673 | 2.445934  | -3.736506 |
| H | -2.493179 | 1.844795  | -4.606016 |
| H | -6.130104 | 2.913617  | -2.578147 |
| H | -4.76356  | 2.862693  | -4.659411 |
| C | -3.222834 | 1.505113  | 1.22846   |
| C | -3.128423 | 2.905215  | 1.234095  |
| C | -3.580156 | 0.857633  | 2.417538  |
| C | -3.385495 | 3.634248  | 2.394366  |
| H | -2.871005 | 3.430994  | 0.32034   |
| C | -3.841199 | 1.58755   | 3.57851   |
| H | -3.656287 | -0.224204 | 2.441895  |
| C | -3.744253 | 2.978126  | 3.572829  |
| H | -3.310624 | 4.717559  | 2.37393   |
| H | -4.12348  | 1.063784  | 4.48705   |
| H | -3.950544 | 3.546039  | 4.47496   |
| C | 3.349339  | -1.374134 | 1.33989   |
| C | 2.593708  | -1.342867 | 2.518998  |
| C | 4.630465  | -1.945126 | 1.38377   |
| C | 3.099465  | -1.876085 | 3.70554   |
| H | 1.603444  | -0.901124 | 2.516174  |
| C | 5.13626   | -2.476204 | 2.570013  |
| H | 5.233695  | -1.989617 | 0.482852  |
| C | 4.371646  | -2.446027 | 3.736595  |
| H | 2.493183  | -1.844857 | 4.606148  |
| H | 6.130039  | -2.913748 | 2.578193  |
| H | 4.763562  | -2.862762 | 4.659499  |
| C | 3.222679  | -1.505332 | -1.228369 |
| C | 3.580083  | -0.857868 | -2.417433 |
| C | 3.128127  | -2.905423 | -1.234027 |
| C | 3.841084  | -1.587793 | -3.578408 |

|   |            |           |           |
|---|------------|-----------|-----------|
| H | 3.656314   | 0.223962  | -2.441771 |
| C | 3.385157   | -3.634464 | -2.394304 |
| H | 2.870621   | -3.431191 | -0.320291 |
| C | 3.744008   | -2.978361 | -3.572747 |
| H | 4.123435   | -1.064042 | -4.486935 |
| H | 3.310175   | -4.717768 | -2.373887 |
| H | 3.950266   | -3.54628  | -4.474882 |
| C | -8.073063  | -3.200342 | -0.013497 |
| C | -9.337075  | -2.657582 | 0.001338  |
| H | -8.03092   | -4.28459  | -0.010986 |
| C | 8.072942   | 3.20021   | 0.01336   |
| C | 9.336997   | 2.657533  | -0.001459 |
| H | 8.030737   | 4.28445   | 0.010756  |
| C | -11.668384 | -2.415246 | 0.034272  |
| C | -11.157796 | -1.139773 | 0.013254  |
| C | 11.668325  | 2.415333  | -0.034482 |
| C | 11.15782   | 1.139834  | -0.013259 |
| C | 10.597112  | 3.416049  | -0.027422 |
| C | -10.597228 | -3.416026 | 0.027058  |
| C | -10.820955 | -4.780037 | 0.043836  |
| C | 10.820829  | 4.780063  | -0.044422 |
| C | -9.786357  | -5.763114 | 0.037914  |
| N | -8.957469  | -6.582067 | 0.033808  |
| C | -12.146357 | -5.311184 | 0.069561  |
| N | -13.22649  | -5.747762 | 0.090631  |
| C | 9.78626    | 5.76317   | -0.03858  |
| N | 8.957517   | 6.582269  | -0.034563 |
| C | 12.146241  | 5.311172  | -0.070355 |
| N | 13.226368  | 5.747757  | -0.091609 |
| C | 9.68375    | 1.207669  | 0.007487  |
| C | -9.683723  | -1.207696 | -0.007498 |
| O | 8.917141   | 0.252418  | 0.028475  |
| O | -8.917039  | -0.252503 | -0.028434 |
| C | 14.582468  | -0.120531 | -0.050867 |
| C | 13.444426  | 0.685658  | -0.04319  |
| C | 12.149088  | 0.115533  | -0.016086 |
| C | 12.01323   | -1.281817 | 0.006595  |
| C | 13.140555  | -2.090827 | -0.000894 |
| C | 14.438642  | -1.504661 | -0.024887 |
| H | 15.574266  | 0.312783  | -0.071848 |
| H | 11.022442  | -1.71692  | 0.028261  |
| C | -12.01304  | 1.281936  | -0.00629  |
| C | -13.140312 | 2.091021  | 0.001278  |

|   |            |           |           |
|---|------------|-----------|-----------|
| C | -14.438437 | 1.50494   | 0.025151  |
| C | -14.582358 | 0.120815  | 0.050929  |
| C | -13.44437  | -0.685449 | 0.043188  |
| C | -12.148994 | -0.115406 | 0.0162    |
| H | -11.022221 | 1.716972  | -0.02787  |
| H | -15.574185 | -0.312435 | 0.071814  |
| S | 13.411177  | 2.451748  | -0.062701 |
| S | -13.411244 | -2.451545 | 0.062456  |
| C | 12.914705  | -3.589831 | 0.086316  |
| C | 15.715908  | -2.324739 | -0.085525 |
| C | -12.914367 | 3.590022  | -0.085803 |
| C | -15.715645 | 2.32511   | 0.085829  |
| F | 15.721284  | -3.33093  | 0.807939  |
| F | 15.904669  | -2.857222 | -1.309475 |
| F | 16.797994  | -1.557126 | 0.179176  |
| F | 13.682988  | -4.277066 | -0.780159 |
| F | 11.630047  | -3.904522 | -0.191143 |
| F | 13.173606  | -4.055945 | 1.325256  |
| F | -15.720564 | 3.331857  | -0.807012 |
| F | -15.904822 | 2.856857  | 1.310032  |
| F | -16.797716 | 1.55778   | -0.179755 |
| F | -13.172994 | 4.056221  | -1.324766 |
| F | -11.629752 | 3.904643  | 0.191938  |
| F | -13.682798 | 4.277253  | 0.780543  |

**Table S5:** Cartesian coordinates of **D5** compound.

| <b>Atom</b> | <b>X-axis</b> | <b>Y-axis</b> | <b>Z-axis</b> |
|-------------|---------------|---------------|---------------|
| C           | 0.336027      | 1.389733      | -0.01361      |
| C           | 1.332416      | 0.42723       | -0.02597      |
| C           | 0.996636      | -0.95282      | -0.00816      |
| C           | -0.33602      | -1.38978      | 0.013866      |
| C           | -1.33241      | -0.42727      | 0.026225      |
| C           | -0.99663      | 0.952774      | 0.008419      |
| H           | 0.576461      | 2.447956      | -0.01741      |
| H           | -0.57646      | -2.448        | 0.017652      |
| C           | -2.24119      | 1.684619      | 0.009528      |
| C           | -3.32641      | 0.824629      | 0.005655      |
| C           | -5.55247      | 3.654692      | 0.012103      |
| C           | -4.36163      | 2.932888      | 0.019357      |
| C           | -4.54678      | 1.53284       | 0.017985      |
| H           | -5.63119      | 4.735851      | 0.010896      |

|   |          |          |          |
|---|----------|----------|----------|
| S | -2.65843 | 3.378743 | 0.022247 |
| S | -6.23063 | 1.106374 | 0.013154 |
| C | -6.688   | 2.827396 | 0.005393 |
| C | -2.86484 | -0.63327 | 0.033663 |
| C | 3.326415 | -0.82467 | -0.00543 |
| C | 4.546786 | -1.53287 | -0.01779 |
| C | 4.361646 | -2.93292 | -0.01917 |
| C | 6.688018 | -2.8274  | -0.00528 |
| C | 5.552496 | -3.65471 | -0.01196 |
| H | 5.63123  | -4.73587 | -0.01078 |
| S | 2.658453 | -3.37879 | -0.02203 |
| S | 6.230632 | -1.10639 | -0.01299 |
| C | 2.241192 | -1.68466 | -0.00929 |
| C | 2.864835 | 0.633231 | -0.03342 |
| C | -3.38911 | -1.27959 | 1.337177 |
| C | -2.63915 | -1.25656 | 2.52011  |
| C | -4.68302 | -1.82123 | 1.377692 |
| C | -3.16303 | -1.77026 | 3.707385 |
| H | -1.63927 | -0.8369  | 2.519792 |
| C | -5.20679 | -2.33311 | 2.564662 |
| H | -5.28219 | -1.85927 | 0.473809 |
| C | -4.44768 | -2.3118  | 3.735032 |
| H | -2.56114 | -1.74639 | 4.611149 |
| H | -6.20967 | -2.74927 | 2.569978 |
| H | -4.85351 | -2.71387 | 4.658395 |
| C | -3.25547 | -1.42834 | -1.23049 |
| C | -3.1991  | -2.83049 | -1.22748 |
| C | -3.58893 | -0.77821 | -2.425   |
| C | -3.4713  | -3.55895 | -2.38464 |
| H | -2.96066 | -3.35807 | -0.30964 |
| C | -3.86481 | -1.50754 | -3.58291 |
| H | -3.63465 | 0.305205 | -2.4564  |
| C | -3.8067  | -2.9002  | -3.56845 |
| H | -3.42722 | -4.64375 | -2.35736 |
| H | -4.1284  | -0.98171 | -4.49584 |
| H | -4.02532 | -3.46764 | -4.46793 |
| C | 3.389085 | 1.27955  | -1.33695 |
| C | 2.639139 | 1.256457 | -2.51989 |
| C | 4.682978 | 1.821251 | -1.37747 |
| C | 3.162998 | 1.770151 | -3.70717 |
| H | 1.639277 | 0.836759 | -2.51957 |
| C | 5.206726 | 2.33312  | -2.56445 |

|   |          |          |          |
|---|----------|----------|----------|
| H | 5.28214  | 1.859335 | -0.47358 |
| C | 4.447628 | 2.31175  | -3.73482 |
| H | 2.561119 | 1.746231 | -4.61094 |
| H | 6.209594 | 2.749328 | -2.56977 |
| H | 4.853453 | 2.713822 | -4.65819 |
| C | 3.255488 | 1.4283   | 1.230721 |
| C | 3.588984 | 0.778178 | 2.425223 |
| C | 3.199098 | 2.830451 | 1.227716 |
| C | 3.864884 | 1.507508 | 3.58313  |
| H | 3.634719 | -0.30524 | 2.456616 |
| C | 3.471321 | 3.558911 | 2.384866 |
| H | 2.960634 | 3.358023 | 0.309883 |
| C | 3.806761 | 2.900166 | 3.568674 |
| H | 4.128495 | 0.981675 | 4.496051 |
| H | 3.427236 | 4.643706 | 2.357595 |
| H | 4.025391 | 3.467603 | 4.468141 |
| C | -7.98311 | 3.40645  | -0.00785 |
| C | -9.26232 | 2.894106 | -0.01603 |
| H | -7.91485 | 4.489392 | -0.01503 |
| C | 7.983135 | -3.40645 | 0.007869 |
| C | 9.262341 | -2.89409 | 0.015987 |
| H | 7.914881 | -4.48939 | 0.014999 |
| C | -11.5996 | 2.706312 | -0.03928 |
| C | -11.118  | 1.420847 | -0.01562 |
| C | 11.59961 | -2.70629 | 0.039068 |
| C | 11.11802 | -1.42083 | 0.015517 |
| C | 10.50208 | -3.68204 | 0.039588 |
| C | -10.5021 | 3.682054 | -0.03976 |
| C | -10.6972 | 5.050263 | -0.06119 |
| C | 10.69727 | -5.05024 | 0.060953 |
| C | -9.64122 | 6.010131 | -0.06356 |
| N | -8.79289 | 6.808785 | -0.06624 |
| C | -12.0121 | 5.606623 | -0.08391 |
| N | -13.086  | 6.058284 | -0.10256 |
| C | 9.64125  | -6.01011 | 0.063372 |
| N | 8.792913 | -6.80877 | 0.066085 |
| C | 12.01209 | -5.60662 | 0.083572 |
| N | 13.08606 | -6.0583  | 0.102132 |
| C | 9.641078 | -1.45415 | 0.001176 |
| C | -9.64106 | 1.454167 | -0.00114 |
| O | 8.901234 | -0.47882 | -0.01906 |
| O | -8.90122 | 0.478837 | 0.019216 |

|   |          |          |          |
|---|----------|----------|----------|
| C | 14.57763 | -0.24622 | 0.042666 |
| C | 13.4159  | -1.02163 | 0.038132 |
| C | 12.13127 | -0.42076 | 0.014044 |
| C | 12.01844 | 0.980447 | -0.00885 |
| C | 13.16924 | 1.750969 | -0.00195 |
| C | 14.45245 | 1.137308 | 0.018135 |
| H | 15.56718 | -0.6887  | 0.06663  |
| H | 11.04284 | 1.452216 | -0.03255 |
| C | -12.0184 | -0.98042 | 0.008819 |
| C | -13.1693 | -1.75093 | 0.001861 |
| C | -14.4525 | -1.13726 | -0.0184  |
| C | -14.5776 | 0.246268 | -0.04304 |
| C | -13.4159 | 1.02167  | -0.03842 |
| C | -12.1313 | 0.420791 | -0.01418 |
| H | -11.0428 | -1.45219 | 0.032639 |
| H | -15.5672 | 0.688757 | -0.06715 |
| S | 13.34112 | -2.78381 | 0.062365 |
| S | -13.3411 | 2.783838 | -0.06275 |
| S | 12.90583 | 3.53783  | -0.075   |
| O | 13.82088 | 4.069813 | -1.10351 |
| O | 11.48334 | 3.795093 | -0.17761 |
| S | 16.01132 | 2.050526 | 0.070355 |
| O | 15.86155 | 3.105778 | 1.090231 |
| O | 17.10046 | 1.099269 | 0.173657 |
| S | -12.9059 | -3.5378  | 0.075043 |
| O | -11.4834 | -3.7951  | 0.177829 |
| O | -13.8211 | -4.06971 | 1.103522 |
| S | -16.0113 | -2.05048 | -0.07075 |
| O | -17.1004 | -1.09921 | -0.17425 |
| O | -15.8615 | -3.10581 | -1.09053 |
| O | 16.11173 | 2.720713 | -1.37977 |
| O | 13.37139 | 4.052439 | 1.36862  |
| O | -13.3713 | -4.05251 | -1.36857 |
| O | -16.1119 | -2.72054 | 1.379427 |
| H | -14.3499 | -3.89356 | -1.44098 |
| H | -15.3732 | -3.38273 | 1.453968 |
| H | 14.34995 | 3.893507 | 1.440943 |
| H | 15.37311 | 3.382919 | -1.4542  |

**Table S6:** Cartesian coordinates of **D6** compound.

| Atom | X-axis | Y-axis | Z-axis |
|------|--------|--------|--------|
|------|--------|--------|--------|



|   |          |          |          |
|---|----------|----------|----------|
| C | 0.295625 | -1.41374 | 0.018661 |
| C | 1.311659 | -0.47173 | 0.042606 |
| C | 1.005324 | 0.914746 | 0.034444 |
| C | -0.31816 | 1.378361 | 0.009573 |
| C | -1.33396 | 0.436451 | -0.01506 |
| C | -1.02783 | -0.9502  | -0.00579 |
| H | 0.514447 | -2.47665 | 0.015382 |
| H | -0.53692 | 2.441315 | 0.012575 |
| C | -2.28815 | -1.65598 | -0.01635 |
| C | -3.35477 | -0.77465 | -0.00998 |
| C | -5.64436 | -3.55638 | -0.03648 |
| C | -4.43631 | -2.85849 | -0.03775 |
| C | -4.5915  | -1.45708 | -0.02746 |
| H | -5.74523 | -4.63562 | -0.04454 |
| S | -2.74323 | -3.3405  | -0.04067 |
| S | -6.2678  | -0.99717 | -0.01606 |
| C | -6.76011 | -2.70736 | -0.02285 |
| C | -2.86218 | 0.673364 | -0.03196 |
| C | 3.332358 | 0.739617 | 0.03776  |
| C | 4.568347 | 1.422664 | 0.054606 |
| C | 4.412316 | 2.824567 | 0.066505 |
| C | 6.73615  | 2.67448  | 0.04503  |
| C | 5.619118 | 3.522965 | 0.062719 |
| H | 5.719309 | 4.602286 | 0.070065 |
| S | 2.718838 | 3.305515 | 0.07166  |
| S | 6.244739 | 0.963612 | 0.039469 |
| C | 2.265233 | 1.620675 | 0.045781 |
| C | 2.839989 | -0.70856 | 0.057037 |
| C | -3.36282 | 1.330882 | -1.33923 |
| C | -2.60092 | 1.302109 | -2.51434 |
| C | -4.64899 | 1.8896   | -1.39219 |
| C | -3.10563 | 1.825298 | -3.7058  |
| H | -1.60662 | 0.869746 | -2.50455 |
| C | -5.15388 | 2.410255 | -2.58337 |
| H | -5.25745 | 1.93106  | -0.49466 |
| C | -4.38315 | 2.382485 | -3.74599 |
| H | -2.49446 | 1.795724 | -4.60317 |
| H | -6.15252 | 2.836519 | -2.59895 |
| H | -4.77463 | 2.790495 | -4.67301 |
| C | -3.24691 | 1.476826 | 1.227978 |
| C | -3.1586  | 2.877372 | 1.22639  |
| C | -3.6078  | 0.834482 | 2.418752 |
| C | -3.42414 | 3.611726 | 2.381385 |

|   |          |          |          |
|---|----------|----------|----------|
| H | -2.89849 | 3.398987 | 0.310972 |
| C | -3.87766 | 1.569691 | 3.574377 |
| H | -3.67993 | -0.24749 | 2.448204 |
| C | -3.78608 | 2.960608 | 3.561669 |
| H | -3.35269 | 4.695219 | 2.355589 |
| H | -4.16251 | 1.049735 | 4.484306 |
| H | -3.99862 | 3.5325   | 4.459877 |
| C | 3.342282 | -1.36912 | 1.362118 |
| C | 2.583937 | -1.33741 | 2.539505 |
| C | 4.625613 | -1.93466 | 1.410676 |
| C | 3.08903  | -1.86487 | 3.728864 |
| H | 1.591796 | -0.89999 | 2.53287  |
| C | 5.130583 | -2.46028 | 2.59969  |
| H | 5.231075 | -1.97918 | 0.511294 |
| C | 4.363342 | -2.42975 | 3.764512 |
| H | 2.480446 | -1.83341 | 4.62793  |
| H | 6.125948 | -2.89424 | 2.61109  |
| H | 4.754549 | -2.84244 | 4.689591 |
| C | 3.223461 | -1.50866 | -1.20558 |
| C | 3.585016 | -0.86322 | -2.39445 |
| C | 3.134194 | -2.90915 | -1.20781 |
| C | 3.85558  | -1.59552 | -3.55176 |
| H | 3.65759  | 0.218797 | -2.42127 |
| C | 3.400692 | -3.64053 | -2.36443 |
| H | 2.873598 | -3.43338 | -0.29404 |
| C | 3.763978 | -2.98641 | -3.54262 |
| H | 4.141759 | -1.0734  | -4.46001 |
| H | 3.330032 | -4.72407 | -2.3413  |
| H | 3.978407 | -3.55615 | -4.44167 |
| C | -8.07128 | -3.26052 | -0.0183  |
| C | -9.3362  | -2.72407 | -0.00261 |
| H | -8.02325 | -4.34445 | -0.02733 |
| C | 8.045345 | 3.229016 | 0.030185 |
| C | 9.311804 | 2.694271 | -0.00074 |
| H | 7.996236 | 4.312896 | 0.040181 |
| C | -11.6683 | -2.492   | 0.027964 |
| C | -11.163  | -1.21311 | 0.031612 |
| C | 11.64388 | 2.465855 | -0.07923 |
| C | 11.13895 | 1.186452 | -0.07931 |
| C | 10.56832 | 3.459757 | -0.02725 |
| C | -10.5955 | -3.48772 | 0.004641 |
| C | -10.8108 | -4.85325 | -0.00648 |
| C | 10.78336 | 4.825373 | -0.00841 |

|   |          |          |          |
|---|----------|----------|----------|
| C | -9.7704  | -5.83008 | -0.02718 |
| N | -8.93765 | -6.64506 | -0.04348 |
| C | -12.1323 | -5.39475 | 0.001786 |
| N | -13.2075 | -5.84387 | 0.007843 |
| C | 9.742929 | 5.800941 | 0.043652 |
| N | 8.909903 | 6.614702 | 0.085755 |
| C | 12.104   | 5.368148 | -0.03832 |
| N | 13.17851 | 5.818273 | -0.06129 |
| C | 9.666671 | 1.246051 | -0.0243  |
| C | -9.68968 | -1.27493 | 0.013715 |
| O | 8.903847 | 0.28734  | -7.2E-05 |
| O | -8.92403 | -0.3183  | 0.01409  |
| C | 14.5653  | -0.05434 | -0.23228 |
| C | 13.42784 | 0.74376  | -0.17329 |
| C | 12.1314  | 0.165292 | -0.13221 |
| C | 11.99567 | -1.23297 | -0.15805 |
| C | 13.1285  | -2.03762 | -0.21136 |
| C | 14.41941 | -1.44348 | -0.24151 |
| H | 15.56649 | 0.360142 | -0.27428 |
| H | 11.001   | -1.66646 | -0.1559  |
| C | -12.02   | 1.206777 | 0.083401 |
| C | -13.156  | 2.008741 | 0.113837 |
| C | -14.4491 | 1.417208 | 0.096234 |
| C | -14.5961 | 0.032616 | 0.098625 |
| C | -13.4534 | -0.76708 | 0.074369 |
| C | -12.1562 | -0.19073 | 0.056261 |
| H | -11.0318 | 1.64926  | 0.102111 |
| H | -15.5931 | -0.39383 | 0.109988 |
| S | 13.38373 | 2.513139 | -0.14376 |
| S | -13.4111 | -2.53409 | 0.056985 |
| C | 12.89794 | -3.52624 | -0.38598 |
| C | 15.69224 | -2.2269  | -0.28766 |
| C | -13.0069 | 3.484205 | 0.317247 |
| C | -15.7231 | 2.212173 | 0.039716 |
| O | 15.50283 | -3.5241  | 0.025206 |
| O | 16.77732 | -1.74985 | -0.5495  |
| O | 12.83222 | -4.02568 | -1.48159 |
| O | 12.65327 | -4.27398 | 0.713531 |
| O | -11.8435 | 3.945861 | -0.18782 |
| O | -13.8067 | 4.182024 | 0.905317 |
| O | -15.6808 | 3.150642 | -0.92242 |
| O | -16.6968 | 1.967721 | 0.718891 |
| C | 16.66561 | -4.36887 | -0.06463 |

|   |          |          |          |
|---|----------|----------|----------|
| H | 17.08177 | -4.33184 | -1.07325 |
| H | 17.42588 | -4.04424 | 0.649314 |
| H | 16.31349 | -5.37202 | 0.170499 |
| C | 12.86423 | -3.7312  | 2.024583 |
| H | 13.90564 | -3.42733 | 2.157591 |
| H | 12.20251 | -2.88393 | 2.22411  |
| H | 12.63066 | -4.54309 | 2.713962 |
| C | -11.5879 | 5.342079 | 0.044248 |
| H | -11.5534 | 5.55349  | 1.115635 |
| H | -10.6227 | 5.543293 | -0.41911 |
| H | -12.3696 | 5.95378  | -0.41181 |
| C | -16.8331 | 4.009037 | -0.9914  |
| H | -16.667  | 4.65266  | -1.85456 |
| H | -17.7446 | 3.420689 | -1.11605 |
| H | -16.9088 | 4.604315 | -0.07842 |

**Table S7:** Cartesian coordinates of **D7** compound.

| <b>Atom</b> | <b>X-axis</b> | <b>Y-axis</b> | <b>Z-axis</b> |
|-------------|---------------|---------------|---------------|
| C           | -0.19658      | 1.416103      | 0.025932      |
| C           | -1.2835       | 0.55715       | 0.036258      |
| C           | -1.08602      | -0.84922      | 0.006459      |
| C           | 0.196594      | -1.4161       | -0.02572      |
| C           | 1.283512      | -0.55715      | -0.03604      |
| C           | 1.086034      | 0.849224      | -0.00625      |
| H           | -0.33055      | 2.492924      | 0.039056      |
| H           | 0.330566      | -2.49292      | -0.03885      |
| C           | 2.396978      | 1.454473      | -0.00711      |
| C           | 3.391643      | 0.491528      | -0.01364      |
| C           | 5.888325      | 3.086666      | 0.000301      |
| C           | 4.631188      | 2.486348      | -0.0107       |
| C           | 4.676459      | 1.075462      | -0.02112      |
| H           | 6.073358      | 4.15472       | 0.008802      |
| S           | 2.980609      | 3.098885      | -0.00675      |
| S           | 6.309916      | 0.484317      | -0.01944      |
| C           | 6.936056      | 2.151342      | 0.000043      |
| C           | 2.788167      | -0.91322      | -0.05334      |
| C           | -3.39163      | -0.49153      | 0.013857      |
| C           | -4.67644      | -1.07546      | 0.021304      |
| C           | -4.63117      | -2.48635      | 0.010861      |
| C           | -6.93604      | -2.15134      | 0.000138      |
| C           | -5.88831      | -3.08667      | -0.00012      |
| H           | -6.07334      | -4.15472      | -0.00864      |

|   |          |          |          |
|---|----------|----------|----------|
| S | -2.98059 | -3.09888 | 0.006915 |
| S | -6.3099  | -0.48432 | 0.019616 |
| C | -2.39696 | -1.45447 | 0.007322 |
| C | -2.78815 | 0.913222 | 0.053554 |
| C | 3.24072  | -1.59383 | -1.36614 |
| C | 2.489944 | -1.49062 | -2.54425 |
| C | 4.478144 | -2.25362 | -1.41993 |
| C | 2.957841 | -2.03908 | -3.73942 |
| H | 1.532956 | -0.98071 | -2.53484 |
| C | 4.946231 | -2.79977 | -2.61474 |
| H | 5.075637 | -2.35686 | -0.51998 |
| C | 4.186812 | -2.69649 | -3.7805  |
| H | 2.355801 | -1.95074 | -4.63906 |
| H | 5.905945 | -3.30751 | -2.63    |
| H | 4.548886 | -3.12493 | -4.71016 |
| C | 3.105353 | -1.75629 | 1.199985 |
| C | 2.910471 | -3.14592 | 1.183429 |
| C | 3.507705 | -1.15486 | 2.398837 |
| C | 3.115074 | -3.90985 | 2.331641 |
| H | 2.615738 | -3.63754 | 0.261903 |
| C | 3.716024 | -1.92001 | 3.547742 |
| H | 3.66102  | -0.08174 | 2.440281 |
| C | 3.520205 | -3.29989 | 3.519854 |
| H | 2.963182 | -4.98457 | 2.294093 |
| H | 4.034993 | -1.43243 | 4.464225 |
| H | 3.685806 | -3.89552 | 4.412405 |
| C | -3.24071 | 1.593854 | 1.366341 |
| C | -2.49003 | 1.490516 | 2.5445   |
| C | -4.47803 | 2.253836 | 1.420042 |
| C | -2.95794 | 2.03902  | 3.739645 |
| H | -1.53312 | 0.98047  | 2.535157 |
| C | -4.94613 | 2.800034 | 2.614826 |
| H | -5.07543 | 2.357195 | 0.520043 |
| C | -4.18682 | 2.696611 | 3.780645 |
| H | -2.35598 | 1.950576 | 4.639329 |
| H | -5.90577 | 3.307922 | 2.630016 |
| H | -4.5489  | 3.125089 | 4.71028  |
| C | -3.10533 | 1.756284 | -1.19978 |
| C | -3.50755 | 1.154844 | -2.39867 |
| C | -2.91059 | 3.145928 | -1.18318 |
| C | -3.71586 | 1.919993 | -3.54757 |
| H | -3.66076 | 0.081711 | -2.44015 |
| C | -3.11519 | 3.909865 | -2.33139 |
| H | -2.61597 | 3.637559 | -0.26162 |

|   |          |          |          |
|---|----------|----------|----------|
| C | -3.52018 | 3.299895 | -3.51964 |
| H | -4.03472 | 1.432403 | -4.46409 |
| H | -2.9634  | 4.984599 | -2.2938  |
| H | -3.68577 | 3.895527 | -4.41219 |
| C | 8.283256 | 2.598461 | 0.013074 |
| C | 9.504503 | 1.961516 | 0.01809  |
| H | 8.323359 | 3.682774 | 0.022647 |
| C | -8.28324 | -2.59846 | -0.0129  |
| C | -9.5045  | -1.96152 | -0.01795 |
| H | -8.32334 | -3.68278 | -0.02245 |
| C | 11.81159 | 1.543321 | 0.036502 |
| C | 11.20508 | 0.311689 | 0.019506 |
| C | -11.8116 | -1.54335 | -0.03659 |
| C | -11.2051 | -0.31171 | -0.01964 |
| C | -10.8174 | -2.62262 | -0.03674 |
| C | 10.81742 | 2.622601 | 0.036895 |
| C | 11.14639 | 3.965111 | 0.053561 |
| C | -11.1464 | -3.96513 | -0.05324 |
| C | 10.1903  | 5.024577 | 0.05595  |
| N | 9.425181 | 5.903313 | 0.05873  |
| C | 12.50965 | 4.389593 | 0.070922 |
| N | 13.62251 | 4.734708 | 0.085257 |
| C | -10.1903 | -5.02462 | -0.05539 |
| N | -9.42515 | -5.90332 | -0.05798 |
| C | -12.5097 | -4.3896  | -0.07066 |
| N | -13.6225 | -4.73461 | -0.08504 |
| C | -9.73953 | -0.49108 | -0.00641 |
| C | 9.739515 | 0.491074 | 0.006538 |
| O | -8.90588 | 0.406257 | 0.010662 |
| O | 8.905853 | -0.40626 | -0.01032 |
| C | -14.5306 | 1.200753 | -0.04094 |
| C | -13.4536 | 0.31616  | -0.03741 |
| C | -12.1119 | 0.786673 | -0.01955 |
| C | -11.8557 | 2.166087 | -0.00531 |
| C | -12.9252 | 3.05791  | -0.00844 |
| C | -14.2698 | 2.573764 | -0.0264  |
| H | -15.5562 | 0.849733 | -0.05456 |
| H | -10.8336 | 2.526005 | 0.007693 |
| C | 11.85571 | -2.16612 | 0.004873 |
| C | 12.92512 | -3.05794 | 0.007795 |
| C | 14.26975 | -2.57381 | 0.025605 |
| C | 14.53054 | -1.2008  | 0.040215 |
| C | 13.4536  | -0.3162  | 0.036912 |
| C | 12.11183 | -0.7867  | 0.019193 |

|   |          |          |          |
|---|----------|----------|----------|
| H | 10.8336  | -2.52603 | -0.00802 |
| H | 15.55617 | -0.84978 | 0.053714 |
| S | -13.5526 | -1.44743 | -0.05376 |
| S | 13.55258 | 1.44739  | 0.053402 |
| C | -15.3714 | 3.488279 | -0.02988 |
| N | -16.2838 | 4.209361 | -0.0331  |
| C | -12.663  | 4.466731 | 0.006964 |
| N | -12.4241 | 5.60451  | 0.02025  |
| C | 12.66298 | -4.46676 | -0.00769 |
| N | 12.42402 | -5.60454 | -0.02102 |
| C | 15.37134 | -3.48833 | 0.028846 |
| N | 16.2838  | -4.20942 | 0.031881 |

**Table S8:** Cartesian coordinates of **D8** compound.

| Atom | X-axis   | Y-axis   | Z-axis   |
|------|----------|----------|----------|
| C    | 0.021311 | 1.428918 | 0.018947 |
| C    | -1.18387 | 0.744876 | 0.024571 |
| C    | -1.20344 | -0.67456 | 0.001293 |
| C    | -0.02132 | -1.42893 | -0.01881 |
| C    | 1.183858 | -0.74489 | -0.02443 |
| C    | 1.203426 | 0.674541 | -0.00115 |
| H    | 0.052565 | 2.513748 | 0.027025 |
| H    | -0.05258 | -2.51376 | -0.02688 |
| C    | 2.592075 | 1.072867 | 0.004757 |
| C    | 3.428564 | -0.02887 | 0.00768  |
| C    | 6.295323 | 2.154373 | 0.018552 |
| C    | 4.959195 | 1.751706 | 0.007605 |
| C    | 4.789195 | 0.35227  | 0.003709 |
| H    | 6.640989 | 3.181771 | 0.021618 |
| S    | 3.421297 | 2.60867  | 0.001374 |
| S    | 6.315902 | -0.4792  | 0.01213  |
| C    | 7.186637 | 1.072627 | 0.023768 |
| C    | 2.617244 | -1.32547 | -0.02895 |
| C    | -3.42858 | 0.028846 | -0.00755 |
| C    | -4.78921 | -0.3523  | -0.00365 |
| C    | -4.9592  | -1.75174 | -0.00761 |
| C    | -7.18665 | -1.07267 | -0.02386 |
| C    | -6.29533 | -2.15441 | -0.01861 |
| H    | -6.64098 | -3.18181 | -0.02174 |
| S    | -3.4213  | -2.60869 | -0.00132 |
| S    | -6.31592 | 0.47916  | -0.01204 |
| C    | -2.59209 | -1.07289 | -0.00464 |
| C    | -2.61726 | 1.325451 | 0.029077 |

|   |          |          |          |
|---|----------|----------|----------|
| C | 2.96825  | -2.07969 | -1.33201 |
| C | 2.242736 | -1.88347 | -2.51414 |
| C | 4.096262 | -2.91361 | -1.3733  |
| C | 2.62702  | -2.51078 | -3.70039 |
| H | 1.371074 | -1.23853 | -2.51377 |
| C | 4.481531 | -3.53809 | -2.55913 |
| H | 4.672259 | -3.08892 | -0.47059 |
| C | 3.746663 | -3.34126 | -3.72859 |
| H | 2.04588  | -2.3472  | -4.6033  |
| H | 5.358453 | -4.17853 | -2.56472 |
| H | 4.043921 | -3.82994 | -4.65162 |
| C | 2.792562 | -2.19646 | 1.233436 |
| C | 2.398717 | -3.54328 | 1.224515 |
| C | 3.260675 | -1.64858 | 2.434104 |
| C | 2.474402 | -4.31793 | 2.381328 |
| H | 2.047392 | -3.99533 | 0.302603 |
| C | 3.34025  | -2.42485 | 3.591439 |
| H | 3.566467 | -0.60837 | 2.469602 |
| C | 2.947196 | -3.76218 | 3.570991 |
| H | 2.16755  | -5.35935 | 2.349403 |
| H | 3.713736 | -1.97962 | 4.508951 |
| H | 3.011967 | -4.36685 | 4.470549 |
| C | -2.96828 | 2.079706 | 1.332104 |
| C | -2.24291 | 1.883392 | 2.51431  |
| C | -4.09615 | 2.913823 | 1.373269 |
| C | -2.62722 | 2.510773 | 3.700511 |
| H | -1.37135 | 1.238315 | 2.51404  |
| C | -4.48144 | 3.538383 | 2.559054 |
| H | -4.672   | 3.089236 | 0.470493 |
| C | -3.74673 | 3.341437 | 3.72859  |
| H | -2.04619 | 2.347107 | 4.603486 |
| H | -5.35825 | 4.17897  | 2.564544 |
| H | -4.044   | 3.830174 | 4.65158  |
| C | -2.79256 | 2.196441 | -1.23331 |
| C | -3.2604  | 1.64852  | -2.43407 |
| C | -2.39901 | 3.543342 | -1.22427 |
| C | -3.33997 | 2.42483  | -3.59138 |
| H | -3.56598 | 0.60825  | -2.46966 |
| C | -2.4747  | 4.318035 | -2.38106 |
| H | -2.04793 | 3.995428 | -0.30228 |
| C | -2.9472  | 3.762241 | -3.57081 |
| H | -3.71324 | 1.979569 | -4.50897 |
| H | -2.16807 | 5.35952  | -2.34904 |
| H | -3.01197 | 4.366942 | -4.47035 |



|   |          |          |          |
|---|----------|----------|----------|
| C | 8.590333 | 1.310504 | 0.031735 |
| C | 9.698888 | 0.499633 | 0.032671 |
| H | 8.791781 | 2.376752 | 0.037718 |
| C | -8.59034 | -1.31055 | -0.0319  |
| C | -9.69889 | -0.49966 | -0.03276 |
| H | -8.7918  | -2.37679 | -0.03801 |
| C | 11.91466 | -0.25059 | 0.030878 |
| C | 11.13488 | -1.39243 | 0.020695 |
| C | -11.9147 | 0.250578 | -0.03096 |
| C | -11.1349 | 1.392415 | -0.02062 |
| C | -11.0994 | -0.95939 | -0.04025 |
| C | 11.09944 | 0.959369 | 0.040111 |
| C | 11.61671 | 2.242408 | 0.053946 |
| C | -11.6167 | -2.24244 | -0.05424 |
| C | 10.82726 | 3.430595 | 0.065685 |
| N | 10.20237 | 4.41435  | 0.075899 |
| C | 13.02768 | 2.460191 | 0.058396 |
| N | 14.18025 | 2.632575 | 0.061971 |
| C | -10.8272 | -3.43059 | -0.06622 |
| N | -10.2023 | -4.41432 | -0.07662 |
| C | -13.0277 | -2.46025 | -0.05881 |
| N | -14.1802 | -2.63275 | -0.06247 |
| C | -9.71063 | 0.993542 | -0.02208 |
| C | 9.710643 | -0.99357 | 0.022238 |
| O | -8.74393 | 1.743663 | -0.01584 |
| O | 8.74395  | -1.74371 | 0.016294 |
| C | -13.2199 | 2.343751 | -0.0158  |
| C | -11.8715 | 2.599721 | -0.01197 |
| C | 13.21996 | -2.34375 | 0.015809 |
| C | 11.87149 | -2.59974 | 0.012146 |
| S | -13.6018 | 0.642085 | -0.03018 |
| S | 13.60183 | -0.64208 | 0.030064 |
| H | -11.4362 | 3.590847 | -0.00357 |
| H | -14.0316 | 3.059287 | -0.01103 |
| H | 14.0316  | -3.05928 | 0.011066 |
| H | 11.43621 | -3.59087 | 0.003935 |

**Table S9:** Cartesian coordinates of **D9** compound.

| Atom | X-axis   | Y-axis   | Z-axis   |
|------|----------|----------|----------|
| C    | -0.08607 | -1.42649 | -0.01364 |
| C    | -1.23654 | -0.6539  | -0.02489 |
| C    | -1.14941 | 0.76306  | -0.00682 |
| C    | 0.086087 | 1.42645  | 0.01382  |

|   |          |          |          |
|---|----------|----------|----------|
| C | 1.236553 | 0.653861 | 0.02507  |
| C | 1.149426 | -0.7631  | 0.006992 |
| H | -0.13636 | -2.51063 | -0.01786 |
| H | 0.13638  | 2.51059  | 0.018036 |
| C | 2.504179 | -1.26493 | 0.005464 |
| C | 3.420969 | -0.22929 | 0.000907 |
| C | 6.116403 | -2.6215  | -0.00486 |
| C | 4.813957 | -2.11957 | 0.006019 |
| C | 4.749154 | -0.71161 | 0.006766 |
| H | 6.384075 | -3.67197 | -0.00665 |
| S | 3.216065 | -2.85862 | 0.013326 |
| S | 6.334132 | 0.002856 | -0.00318 |
| C | 7.086133 | -1.60994 | -0.01297 |
| C | 2.709567 | 1.124916 | 0.030807 |
| C | -3.42095 | 0.229248 | -0.00073 |
| C | -4.74914 | 0.711571 | -0.0066  |
| C | -4.81394 | 2.119523 | -0.00587 |
| C | -7.08612 | 1.609896 | 0.012998 |
| C | -6.11639 | 2.621457 | 0.004942 |
| H | -6.38406 | 3.671925 | 0.006672 |
| S | -3.21605 | 2.858578 | -0.01316 |
| S | -6.33411 | -0.0029  | 0.003395 |
| C | -2.50416 | 1.264886 | -0.00529 |
| C | -2.70955 | -1.12496 | -0.03062 |
| C | 3.114762 | 1.855547 | 1.331481 |
| C | 2.372137 | 1.725266 | 2.511966 |
| C | 4.306512 | 2.59561  | 1.372546 |
| C | 2.803275 | 2.324541 | 3.696672 |
| H | 1.450454 | 1.154066 | 2.512032 |
| C | 4.738661 | 3.191569 | 2.556841 |
| H | 4.896863 | 2.720118 | 0.47064  |
| C | 3.987311 | 3.060293 | 3.725072 |
| H | 2.208038 | 2.213232 | 4.598373 |
| H | 5.664826 | 3.758468 | 2.562084 |
| H | 4.321277 | 3.526764 | 4.647032 |
| C | 2.953577 | 1.975448 | -1.23393 |
| C | 2.658735 | 3.347418 | -1.2314  |
| C | 3.38706  | 1.390633 | -2.43017 |
| C | 2.796239 | 4.110226 | -2.39036 |
| H | 2.336797 | 3.827285 | -0.31276 |
| C | 3.528599 | 2.154827 | -3.58967 |
| H | 3.617582 | 0.331074 | -2.46017 |
| C | 3.233386 | 3.517169 | -3.57568 |
| H | 2.565839 | 5.171328 | -2.36355 |

|   |          |          |          |
|---|----------|----------|----------|
| H | 3.873727 | 1.680403 | -4.50364 |
| H | 3.346418 | 4.11229  | -4.47685 |
| C | -3.11475 | -1.8556  | -1.33128 |
| C | -2.3721  | -1.72536 | -2.51176 |
| C | -4.30652 | -2.59563 | -1.37236 |
| C | -2.80324 | -2.32464 | -3.69646 |
| H | -1.4504  | -1.15419 | -2.51182 |
| C | -4.73867 | -3.19159 | -2.55665 |
| H | -4.89689 | -2.7201  | -0.47046 |
| C | -3.9873  | -3.06035 | -3.72487 |
| H | -2.20799 | -2.21336 | -4.59816 |
| H | -5.66485 | -3.75846 | -2.5619  |
| H | -4.32127 | -3.52683 | -4.64683 |
| C | -2.95355 | -1.97547 | 1.23413  |
| C | -3.38708 | -1.39065 | 2.430357 |
| C | -2.65865 | -3.34743 | 1.231645 |
| C | -3.52861 | -2.15482 | 3.58987  |
| H | -3.61764 | -0.3311  | 2.460327 |
| C | -2.79614 | -4.11022 | 2.390613 |
| H | -2.33667 | -3.8273  | 0.313025 |
| C | -3.23334 | -3.51715 | 3.575916 |
| H | -3.87377 | -1.68039 | 4.503826 |
| H | -2.5657  | -5.17131 | 2.363836 |
| H | -3.34636 | -4.11226 | 4.477093 |
| C | 8.468441 | -1.95327 | -0.02364 |
| C | 9.634014 | -1.22782 | -0.02811 |
| H | 8.588449 | -3.03152 | -0.02914 |
| C | -8.46843 | 1.953234 | 0.023498 |
| C | -9.63402 | 1.227816 | 0.027864 |
| H | -8.58842 | 3.031493 | 0.028931 |
| C | 11.90305 | -0.6469  | -0.03244 |
| C | 11.20212 | 0.54758  | -0.01988 |
| C | -11.9031 | 0.646949 | 0.032117 |
| C | -11.2022 | -0.54755 | 0.019744 |
| C | -10.9997 | 1.789056 | 0.039071 |
| C | 10.99966 | -1.78903 | -0.0395  |
| C | 11.4156  | -3.10967 | -0.05518 |
| C | -11.4156 | 3.109709 | 0.054555 |
| C | 10.53631 | -4.23261 | -0.06511 |
| N | 9.83834  | -5.16611 | -0.07392 |
| C | 12.80432 | -3.43978 | -0.06389 |
| N | 13.93856 | -3.70789 | -0.07104 |
| C | -10.5362 | 4.232622 | 0.064415 |
| N | -9.83829 | 5.166136 | 0.073165 |

|   |          |          |          |
|---|----------|----------|----------|
| C | -12.8043 | 3.439848 | 0.063155 |
| N | -13.9385 | 3.708022 | 0.070208 |
| C | -9.75592 | -0.2577  | 0.017484 |
| C | 9.75588  | 0.257695 | -0.01764 |
| O | -8.85485 | -1.08675 | 0.008581 |
| O | 8.854789 | 1.086723 | -0.0087  |
| C | -14.2797 | -2.44029 | 0.01338  |
| C | -13.3986 | -1.32391 | 0.020303 |
| C | -12.0435 | -1.67545 | 0.013056 |
| C | -13.577  | -3.6154  | 0.001062 |
| H | -15.3609 | -2.38473 | 0.017214 |
| C | 13.5769  | 3.615485 | -0.00081 |
| C | 14.27961 | 2.440388 | -0.01334 |
| C | 13.39849 | 1.323988 | -0.02039 |
| C | 12.04343 | 1.675507 | -0.01305 |
| H | 15.36083 | 2.384851 | -0.01722 |
| S | -13.6347 | 0.415188 | 0.036087 |
| S | 13.63462 | -0.4151  | -0.03645 |
| H | -13.9816 | -4.61839 | -0.00626 |
| H | 13.98144 | 4.618478 | 0.006653 |
| S | -11.8412 | -3.40194 | -0.00231 |
| S | 11.8411  | 3.401991 | 0.002585 |

**Table S10:** Wavelength ( $\lambda$ ), transition energy ( $E_g$ ), oscillator strength ( $f_{os}$ ) and nature of molecular orbital contributions of **R1** in chloroform.

| NO | $\lambda$ (nm) | $E_g$ (eV) | $f_{os}$ | MO contributions                        |
|----|----------------|------------|----------|-----------------------------------------|
| 1  | 719.082        | 1.724      | 2.739    | H→L (99%),                              |
| 2  | 607.349        | 2.041      | 0.001    | H→L+1 (98%),                            |
| 3  | 504.904        | 2.456      | 0.003    | H-1→L (97%),                            |
| 4  | 463.233        | 2.677      | 0.340    | H-1→L+1 (91%), H→L+2 (6%)               |
| 5  | 451.706        | 2.745      | 0.009    | H-2→L (91%), H-4→L (4%), H-3→L+1 (3%)   |
| 6  | 448.763        | 2.763      | 0.014    | H-3→L (89%), H-4→L+1 (5%), H-2→L+1 (3%) |

MO=molecular orbital, H=HOMO, L=LUMO,  $f_{os}$ =oscillator strength

**Table S11:** Wavelength ( $\lambda$ ), transition energy ( $E_g$ ), oscillator strength ( $f_{os}$ ) and nature of molecular orbital contributions of **D2** in chloroform.

| NO | $\lambda$ (nm) | $E_g$ (eV) | $f_{os}$ | MO contributions        |
|----|----------------|------------|----------|-------------------------|
| 1  | 737.562        | 1.681      | 1.786    | H→L (97%), H-1→L+1 (3%) |
| 2  | 681.531        | 1.819      | 0.000    | H→L+1 (96%),            |
| 3  | 567.615        | 2.184      | 1.393    | H→L+2 (96%),            |

|   |         |       |       |                                         |
|---|---------|-------|-------|-----------------------------------------|
| 4 | 524.313 | 2.365 | 0.000 | H-1→L (83%), H→L+3 (11%),<br>H→L+1 (2%) |
| 5 | 498.890 | 2.485 | 0.109 | H-1→L+1 (90%), H-2→L (2%),<br>H→L (3%)  |
| 6 | 482.129 | 2.572 | 0.000 | H-1→L (11%), H→L+3 (87%),               |

MO=molecular orbital, H=HOMO, L=LUMO,  $f_{os}$ =oscillator strength

**Table S12:** Wavelength ( $\lambda$ ), transition energy ( $E_g$ ), oscillator strength ( $f_{os}$ ) and nature of molecular orbital contributions of **D3** in chloroform.

| NO | $\lambda$ (nm) | $E_g$ (eV) | $f_{os}$ | MO contributions                        |
|----|----------------|------------|----------|-----------------------------------------|
| 1  | 794.516        | 1.561      | 1.663    | H→L (98%),                              |
| 2  | 733.417        | 1.691      | 0.000    | H→L+1 (97%),                            |
| 3  | 581.158        | 2.133      | 1.375    | H→L+2 (97%),                            |
| 4  | 553.328        | 2.241      | 0.000    | H-1→L (56%), H→L+3 (36%),<br>H→L+5 (3%) |
| 5  | 538.476        | 2.303      | 0.000    | H-1→L (38%), H→L+3 (61%),               |
| 6  | 537.799        | 2.305      | 0.233    | H-1→L+1 (11%), H→L+4<br>(86%),          |

MO=molecular orbital, H=HOMO, L=LUMO,  $f_{os}$ =oscillator strength

**Table S13:** Wavelength ( $\lambda$ ), transition energy ( $E_g$ ), oscillator strength ( $f_{os}$ ) and nature of molecular orbital contributions of **D4** in chloroform.

| NO | $\lambda$ (nm) | $E_g$ (eV) | $f_{os}$ | MO contributions          |
|----|----------------|------------|----------|---------------------------|
| 1  | 747.839        | 1.658      | 1.781    | H→L (97%), H-1→L+1 (2%),  |
| 2  | 689.606        | 1.798      | 0.000    | H→L+1 (96%),              |
| 3  | 568.970        | 2.179      | 1.374    | H→L+2 (96%),              |
| 4  | 527.817        | 2.349      | 0.000    | H-1→L (85%), H→L+3 (10%), |
| 5  | 501.514        | 2.472      | 0.098    | H-1→L+1 (92%), H→L (3%)   |
| 6  | 483.784        | 2.563      | 0.000    | H-1→L (11%), H→L+3 (87%), |

MO=molecular orbital, H=HOMO, L=LUMO,  $f_{os}$ =oscillator strength

**Table S14:** Wavelength ( $\lambda$ ), transition energy ( $E_g$ ), oscillator strength ( $f_{os}$ ) and nature of molecular orbital contributions of **D5** in chloroform.

| NO | $\lambda$ (nm) | $E_g$ (eV) | $f_{os}$ | MO contributions        |
|----|----------------|------------|----------|-------------------------|
| 1  | 778.257        | 1.593      | 1.738    | H→L (98%),              |
| 2  | 716.672        | 1.730      | 0.000    | H→L+1 (97%),            |
| 3  | 577.503        | 2.147      | 1.438    | H→L+2 (97%),            |
| 4  | 541.463        | 2.290      | 0.000    | H-1→L (88%), H→L+3 (8%) |
| 5  | 515.227        | 2.406      | 0.088    | H-1→L+1 (94%), H→L (2%) |
| 6  | 491.202        | 2.524      | 0.000    | H→L+3 (90%), H-1→L (8%) |

MO=molecular orbital, H=HOMO, L=LUMO,  $f_{os}$ =oscillator strength

**Table S15:** Wavelength ( $\lambda$ ), transition energy ( $E_g$ ), oscillator strength ( $f_{os}$ ) and nature of molecular orbital contributions of **D6** in chloroform.

| NO | $\lambda$ (nm) | $E_g$ (eV) | $f_{os}$ | MO contributions        |
|----|----------------|------------|----------|-------------------------|
| 1  | 747.929        | 1.658      | 1.750    | H→L (97%), H-1→L+1 (2%) |
| 2  | 687.960        | 1.802      | 0.035    | H→L+1 (96%),            |
| 3  | 566.889        | 2.187      | 1.400    | H→L+2 (96%),            |
| 4  | 528.605        | 2.346      | 0.004    | H-1→L (86%), H→L+3 (9%) |
| 5  | 501.940        | 2.470      | 0.100    | H-1→L+1 (89%), H→L (2%) |
| 6  | 482.579        | 2.569      | 0.002    | H→L+3 (88%), H-1→L (9%) |

MO=molecular orbital, H=HOMO, L=LUMO,  $f_{os}$ =oscillator strength

**Table S16:** Wavelength ( $\lambda$ ), transition energy ( $E_g$ ), oscillator strength ( $f_{os}$ ) and nature of molecular orbital contributions of **D7** in chloroform.

| NO | $\lambda$ (nm) | $E_g$ (eV) | $f_{os}$ | MO contributions        |
|----|----------------|------------|----------|-------------------------|
| 1  | 778.795        | 1.592      | 1.711    | H→L (97%), H-1→L+1 (2%) |
| 2  | 718.707        | 1.725      | 0.000    | H→L+1 (97%),            |
| 3  | 577.961        | 2.145      | 1.476    | H→L+2 (97%),            |
| 4  | 542.102        | 2.287      | 0.000    | H-1→L (88%), H→L+3 (8%) |
| 5  | 516.687        | 2.400      | 0.090    | H-1→L+1 (93%), H→L (2%) |
| 6  | 491.825        | 2.521      | 0.000    | H→L+3 (90%), H-1→L (8%) |

MO=molecular orbital, H=HOMO, L=LUMO,  $f_{os}$ =oscillator strength

**Table S17:** Wavelength ( $\lambda$ ), transition energy ( $E_g$ ), oscillator strength ( $f_{os}$ ) and nature of molecular orbital contributions of **D8** in chloroform.

| NO | $\lambda$ (nm) | $E_g$ (eV) | $f_{os}$ | MO contributions          |
|----|----------------|------------|----------|---------------------------|
| 1  | 682.657        | 1.816      | 2.229    | H→L (98%),                |
| 2  | 617.359        | 2.008      | 0.000    | H→L+1 (96%),              |
| 3  | 538.476        | 2.303      | 0.803    | H→L+2 (95%),              |
| 4  | 495.976        | 2.500      | 0.000    | H-1→L (64%), H→L+3 (31%), |
| 5  | 466.439        | 2.658      | 0.000    | H-1→L (33%), H→L+3 (65%), |
| 6  | 460.394        | 2.693      | 0.160    | H-1→L+1 (92%), H→L (2%)   |

MO=molecular orbital, H=HOMO, L=LUMO,  $f_{os}$ =oscillator strength

**Table S18:** Wavelength ( $\lambda$ ), transition energy ( $E_g$ ), oscillator strength ( $f_{os}$ ) and nature of molecular orbital contributions of **D9** in chloroform.

| NO | $\lambda$ (nm) | $E_g$ (eV) | $f_{os}$ | MO contributions        |
|----|----------------|------------|----------|-------------------------|
| 1  | 700.555        | 1.770      | 1.930    | H→L (96%), H-1→L+1 (3%) |
| 2  | 646.829        | 1.917      | 0.000    | H→L+1 (95%),            |

|   |         |       |       |                                                    |
|---|---------|-------|-------|----------------------------------------------------|
| 3 | 561.091 | 2.210 | 1.177 | H→L+2 (95%), H-1→L+3 (2%)                          |
| 4 | 508.883 | 2.436 | 0.000 | H-1→L (70%), H→L+3 (23%),<br>H→L+1 (3%)            |
| 5 | 481.417 | 2.575 | 0.158 | H-1→L+1 (87%), H-2→L (3%),<br>H→L (3%), H→L+2 (2%) |
| 6 | 477.542 | 2.596 | 0.000 | H-1→L (23%), H→L+3 (75%),                          |

MO=molecular orbital, H=HOMO, L=LUMO,  $f_{os}$ =oscillator strength

**Table S19:** Wavelength ( $\lambda$ ), transition energy ( $E_g$ ), oscillator strength ( $f_{os}$ ) and nature of molecular orbital contributions of **R1** in gas phase.

| NO | $\lambda$ (nm) | $E_g$ (eV) | $f_{os}$ | MO contributions                                                 |
|----|----------------|------------|----------|------------------------------------------------------------------|
| 1  | 673.242        | 1.842      | 2.375    | H→L (100%),                                                      |
| 2  | 589.559        | 2.103      | 0.001    | H→L+1 (93%), H-1→L (6%)                                          |
| 3  | 486.346        | 2.549      | 0.003    | H-1→L (90%), H→L+1 (6%)                                          |
| 4  | 458.386        | 2.705      | 0.339    | H-1→L+1 (87%), H→L+2 (7%)                                        |
| 5  | 445.554        | 2.783      | 0.103    | H-2→L (75%), H-4→L (4%), H-3→L<br>(6%), H-2→L+1 (6%), H→L+2 (5%) |
| 6  | 443.466        | 2.796      | 0.009    | H-4→L (24%), H-3→L (59%), H-<br>4→L+1 (3%), H-2→L (9%)           |

MO=molecular orbital, H=HOMO, L=LUMO,  $f_{os}$ =oscillator strength

**Table S20:** Wavelength ( $\lambda$ ), transition energy ( $E_x$ ), oscillator strength ( $f_{os}$ ) and nature of molecular orbital contributions of **D2** in gas phase.

| NO | $\lambda$ (nm) | $E_g$ (eV) | $f_{os}$ | MO contributions                           |
|----|----------------|------------|----------|--------------------------------------------|
| 1  | 693.928        | 1.787      | 1.498    | H→L (96%), H-1→L+1 (2%)                    |
| 2  | 650.153        | 1.907      | 0.000    | H→L+1 (95%),                               |
| 3  | 548.773        | 2.259      | 1.389    | H→L+2 (95%),                               |
| 4  | 512.289        | 2.420      | 0.000    | H-1→L (73%), H→L+3 (21%),                  |
| 5  | 484.616        | 2.558      | 0.102    | H-1→L+1 (89%), H-2→L (2%), H→L<br>(2%)     |
| 6  | 465.546        | 2.663      | 0.000    | H-1→L (19%), H→L+3 (75%), H-<br>1→L+2 (4%) |

MO=molecular orbital, H=HOMO, L=LUMO,  $f_{os}$ =oscillator strength

**Table S21:** Wavelength ( $\lambda$ ), transition energy ( $E_x$ ), oscillator strength ( $f_{os}$ ) and nature of molecular orbital contributions of **D3** in gas phase.

| NO | $\lambda$ (nm) | $E_g$ (eV) | $f_{os}$ | MO contributions                        |
|----|----------------|------------|----------|-----------------------------------------|
| 1  | 744.784        | 1.665      | 1.343    | H→L (97%),                              |
| 2  | 699.290        | 1.773      | 0.000    | H→L+1 (97%),                            |
| 3  | 563.693        | 2.200      | 1.487    | H→L+2 (96%),                            |
| 4  | 535.014        | 2.317      | 0.000    | H-1→L (78%), H→L+3 (16%),<br>H→L+5 (2%) |
| 5  | 509.510        | 2.433      | 0.100    | H-1→L+1 (91%), H→L+4 (3%)               |

|   |         |       |       |                                         |
|---|---------|-------|-------|-----------------------------------------|
| 6 | 494.276 | 2.508 | 0.000 | H-1→L (14%), H→L+3 (79%),<br>H→L+5 (4%) |
|---|---------|-------|-------|-----------------------------------------|

MO=molecular orbital, H=HOMO, L=LUMO,  $f_{os}$ =oscillator strength

**Table S22:** Wavelength ( $\lambda$ ), transition energy ( $E_x$ ), oscillator strength ( $f_{os}$ ) and nature of molecular orbital contributions of **D4** in gas phase.

| NO | $\lambda$ (nm) | $E_g$ (eV) | $f_{os}$ | MO contributions                       |
|----|----------------|------------|----------|----------------------------------------|
| 1  | 705.217        | 1.758      | 1.465    | H→L (97%),                             |
| 2  | 660.650        | 1.877      | 0.000    | H→L+1 (96%),                           |
| 3  | 551.384        | 2.249      | 1.390    | H→L+2 (96%),                           |
| 4  | 516.708        | 2.400      | 0.000    | H-1→L (75%), H→L+3 (20%),              |
| 5  | 488.665        | 2.537      | 0.096    | H-1→L+1 (92%),                         |
| 6  | 468.130        | 2.649      | 0.000    | H-1→L (19%), H→L+3 (75%), H-1→L+2 (3%) |

MO=molecular orbital, H=HOMO, L=LUMO,  $f_{os}$ =oscillator strength

**Table S23:** Wavelength ( $\lambda$ ), transition energy ( $E_x$ ), oscillator strength ( $f_{os}$ ) and nature of molecular orbital contributions of **D5** in gas phase.

| NO | $\lambda$ (nm) | $E_g$ (eV) | $f_{os}$ | MO contributions                       |
|----|----------------|------------|----------|----------------------------------------|
| 1  | 738.749        | 1.678      | 1.387    | H→L (97%),                             |
| 2  | 692.533        | 1.790      | 0.000    | H→L+1 (97%),                           |
| 3  | 562.440        | 2.204      | 1.491    | H→L+2 (96%),                           |
| 4  | 531.596        | 2.332      | 0.000    | H-1→L (81%), H→L+3 (16%),              |
| 5  | 505.007        | 2.455      | 0.080    | H-1→L+1 (94%),                         |
| 6  | 478.482        | 2.591      | 0.000    | H-1→L (15%), H→L+3 (78%), H-1→L+2 (2%) |

MO=molecular orbital, H=HOMO, L=LUMO,  $f_{os}$ =oscillator strength

**Table S24:** Wavelength ( $\lambda$ ), transition energy ( $E_x$ ), oscillator strength ( $f_{os}$ ) and nature of molecular orbital contributions of **D6** in gas phase.

| NO | $\lambda$ (nm) | $E_g$ (eV) | $f_{os}$ | MO contributions                                        |
|----|----------------|------------|----------|---------------------------------------------------------|
| 1  | 701.030        | 1.769      | 1.433    | H→L (97%),                                              |
| 2  | 649.438        | 1.909      | 0.109    | H→L+1 (95%),                                            |
| 3  | 546.619        | 2.268      | 1.358    | H→L+2 (95%),                                            |
| 4  | 515.013        | 2.407      | 0.015    | H-1→L (77%), H→L+3 (17%),                               |
| 5  | 485.375        | 2.554      | 0.086    | H-1→L+1 (83%), H-1→L (2%),<br>H→L+3 (5%)                |
| 6  | 464.586        | 2.669      | 0.010    | H-1→L (14%), H→L+3 (74%),<br>H-1→L+1 (6%), H-1→L+2 (3%) |



MO=molecular orbital, H=HOMO, L=LUMO,  $f_{os}$ =oscillator strength

**Table S25:** Wavelength ( $\lambda$ ), transition energy ( $E_x$ ), oscillator strength ( $f_{os}$ ) and nature of molecular orbital contributions of **D7** in gas phase.

| NO | $\lambda$ (nm) | $E_g$ (eV) | $f_{os}$ | MO contributions                          |
|----|----------------|------------|----------|-------------------------------------------|
| 1  | 734.504        | 1.688      | 1.374    | H→L (97%),                                |
| 2  | 689.567        | 1.798      | 0.000    | H→L+1 (96%),                              |
| 3  | 561.828        | 2.207      | 1.517    | H→L+2 (96%),                              |
| 4  | 529.847        | 2.340      | 0.000    | H-1→L (80%), H→L+3 (16%),                 |
| 5  | 503.898        | 2.461      | 0.083    | H-1→L+1 (93%),                            |
| 6  | 477.505        | 2.597      | 0.000    | H-1→L (15%), H→L+3 (79%),<br>H-1→L+2 (3%) |

MO=molecular orbital, H=HOMO, L=LUMO,  $f_{os}$ =oscillator strength

**Table S26:** Wavelength ( $\lambda$ ), transition energy ( $E_x$ ), oscillator strength ( $f_{os}$ ) and nature of molecular orbital contributions of **D8** in gas phase.

| NO | $\lambda$ (nm) | $E_g$ (eV) | $f_{os}$ | MO contributions          |
|----|----------------|------------|----------|---------------------------|
| 1  | 643.773        | 1.926      | 1.885    | H→L (98%),                |
| 2  | 592.659        | 2.092      | 0.000    | H→L+1 (95%), H-1→L+2 (2%) |
| 3  | 521.139        | 2.379      | 0.812    | H→L+2 (95%),              |
| 4  | 488.781        | 2.537      | 0.000    | H-1→L (57%), H→L+3 (39%), |
| 5  | 449.903        | 2.756      | 0.159    | H-1→L+1 (92%),            |
| 6  | 447.306        | 2.772      | 0.000    | H-1→L (39%), H→L+3 (56%), |

MO=molecular orbital, H=HOMO, L=LUMO,  $f_{os}$ =oscillator strength

**Table S27:** Wavelength ( $\lambda$ ), transition energy ( $E_x$ ), oscillator strength ( $f_{os}$ ) and nature of molecular orbital contributions of **D9** in gas phase.

| NO | $\lambda$ (nm) | $E_g$ (eV) | $f_{os}$ | MO contributions                                   |
|----|----------------|------------|----------|----------------------------------------------------|
| 1  | 661.955        | 1.873      | 1.618    | H→L (96%), H-1→L+1 (2%)                            |
| 2  | 619.085        | 2.003      | 0.000    | H→L+1 (94%), H-1→L+2 (2%)                          |
| 3  | 540.472        | 2.294      | 1.176    | H→L+2 (94%),                                       |
| 4  | 498.930        | 2.485      | 0.000    | H-1→L (61%), H→L+3 (33%),<br>H→L+1 (2%)            |
| 5  | 467.177        | 2.654      | 0.127    | H-1→L+1 (88%), H-2→L (2%),<br>H→L (2%), H→L+2 (2%) |
| 6  | 457.810        | 2.708      | 0.000    | H-1→L (30%), H→L+3 (63%),<br>H-1→L+2 (5%)          |

MO=molecular orbital, H=HOMO, L=LUMO,  $f_{os}$ =oscillator strength

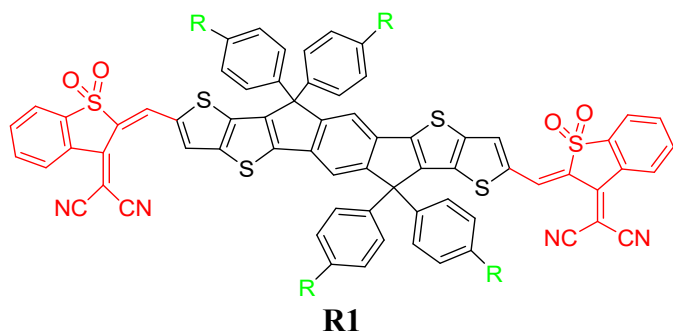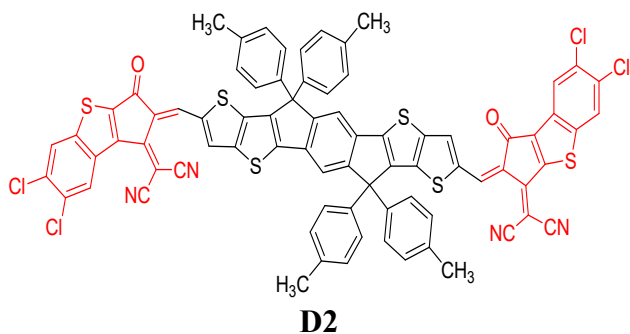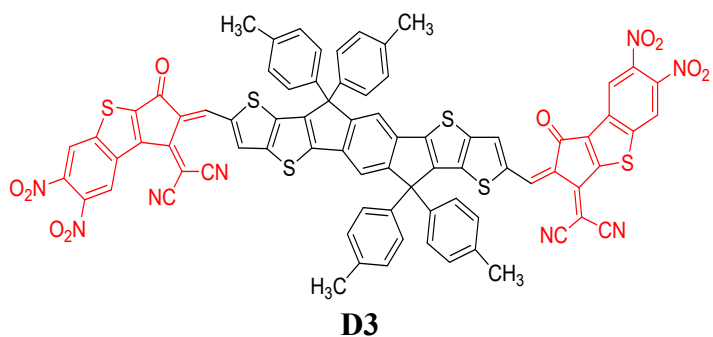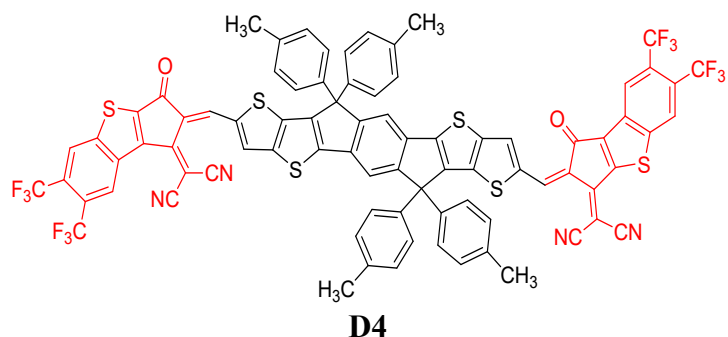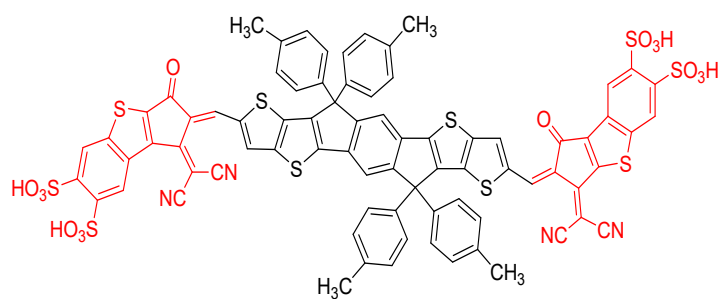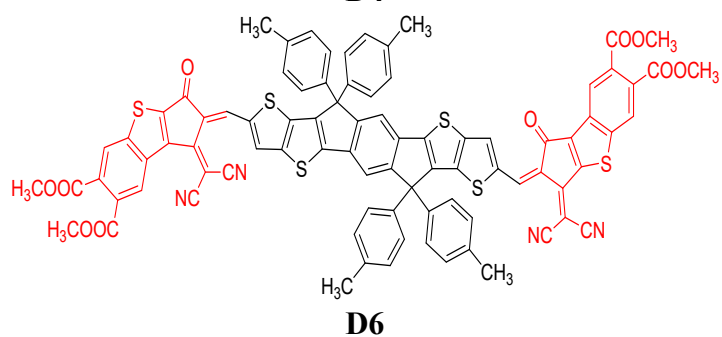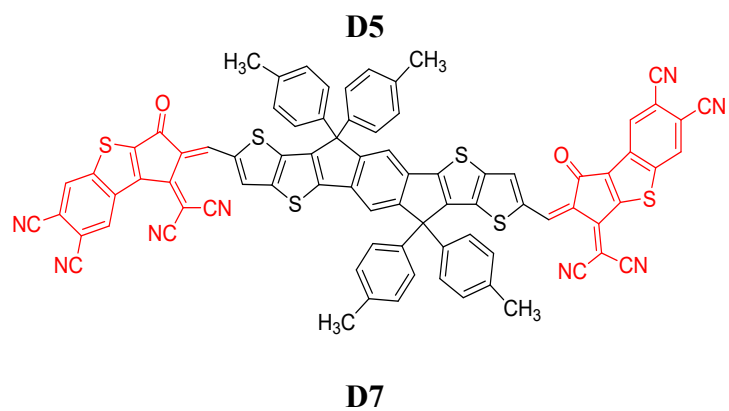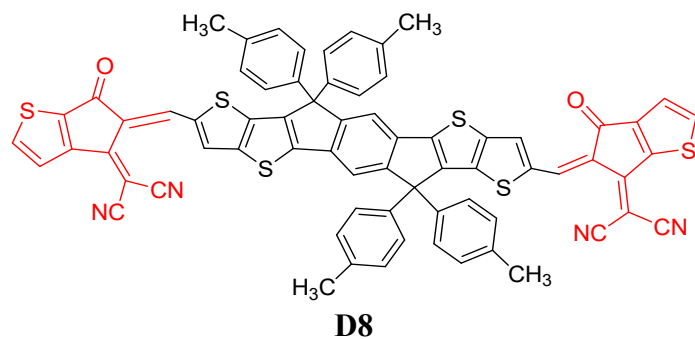

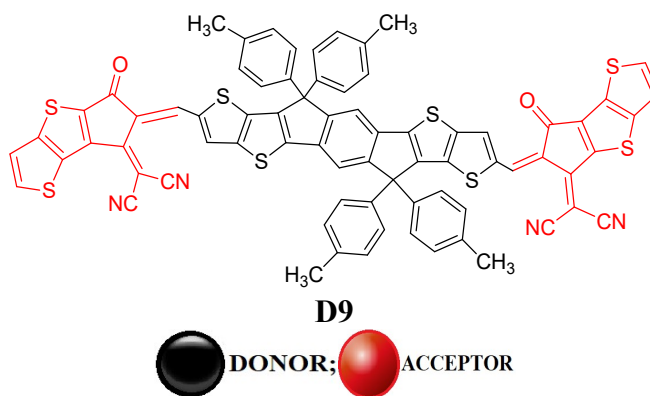

**Fig. S1.** 2D structural representations of the reference and designed chromophores.

The **R1** molecule has been modified with end-capped acceptor substitutions 2-(6,7-dichloro-2-methylene-3-oxo-2,3-dihydro-1H-benzo[b]cyclopenta[d]thiophen-1-ylidene)malononitrile (**D2**), 2-(2-methylene-6,7-dinitro-3-oxo-2,3-dihydro-1H-benzo[b]cyclopenta[d]thiophen-1-ylidene)malononitrile (**D3**), 2-(2-methylene-3-oxo-6,7-bis(trifluoromethyl)-2,3-dihydro-1H-benzo[b]cyclopenta[d]thiophen-1-ylidene)malononitrile (**D4**), 1-(dicyanomethylene)-2-methylene-3-oxo-2,3-dihydro-1H-benzo[b]cyclopenta[d]thiophene-6,7-disulfonic acid (**D5**), dimethyl 1-(dicyanomethylene)-2-methylene-3-oxo-2,3-dihydro-1H-benzo[b]cyclopenta[d]thiophene-6,7-dicarboxylate (**D6**), 1-(dicyano-methylene)-2-methylene-3-oxo-2,3-dihydro-1H-benzo[b]cyclopenta[d]thiophene-6,7-dicarbonyl nitrile (**D7**), 2-(5-methylene-6-oxo-5,6-dihydro-4H-cyclopenta[b]thiophen-4-ylidene)malononitrile (**D8**), 2-(6-methylene-5-oxo-5H-cyclopenta[b]thieno[2,3-d]thiophen-7(6H)-ylidene)malononitrile (**D9**), as shown in Scheme 1 & Fig. S1.
